# Supplementary material for: Intrainstitutional Changes of the Treatment of Supracondylar Humerus Fracture in Children over a Period of 9 Years
Source: MDPI journal article supplement (doi:10.3390/children11010027), 2023-12-26
Supplement: s1 [file s1]

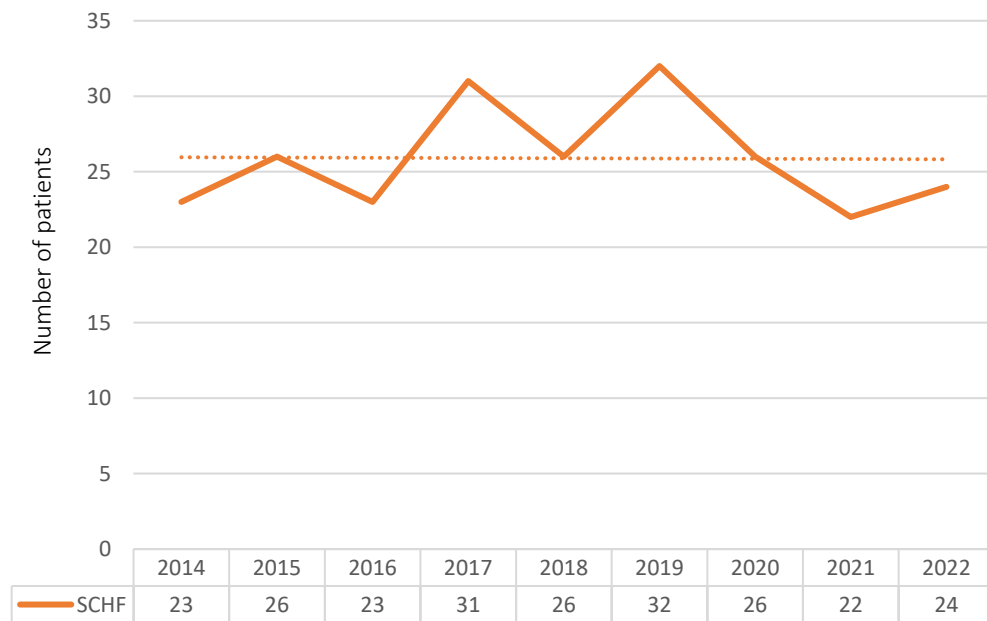

**Figure S1.** Number of patients operated on per year for SCHF. The dashed line shows the average of 25.9 fractures per year.

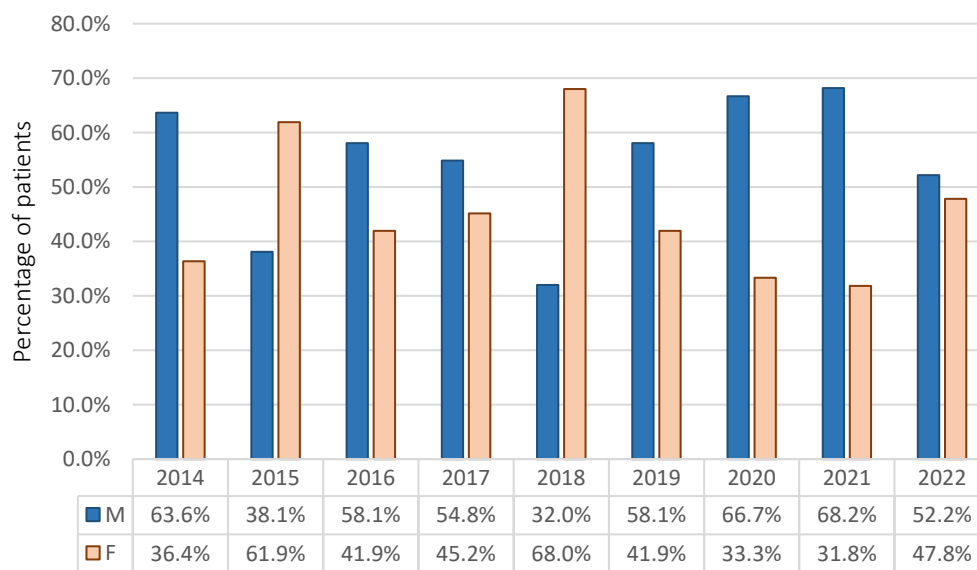

**Figure S2.** Annual distribution of male and female patients undergoing surgery for SCHF. M-Males, F-Females.

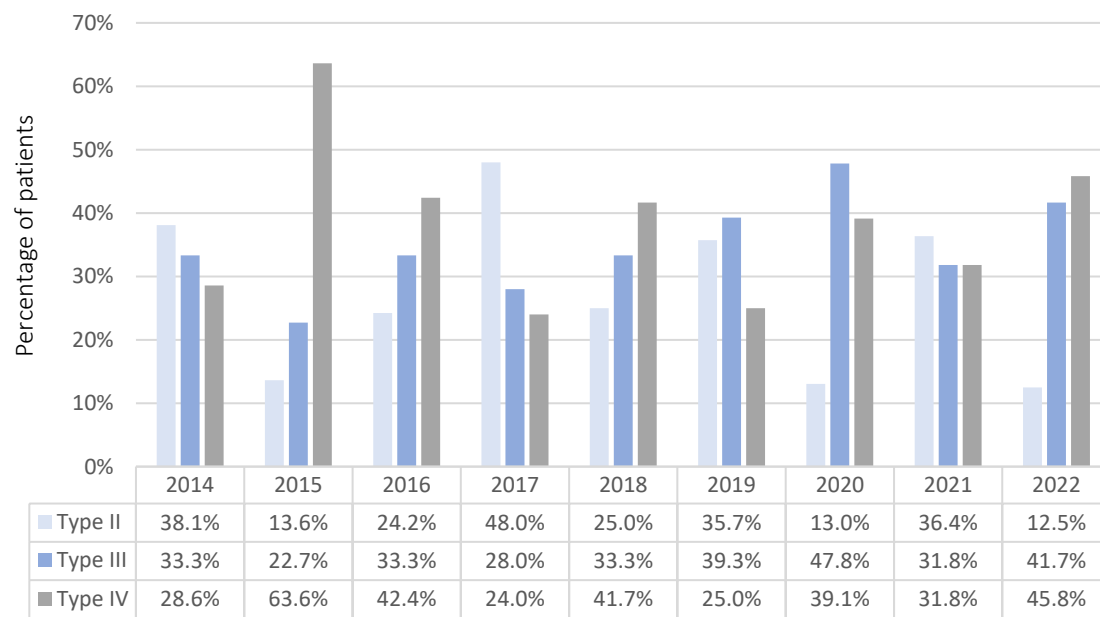

**Figure S3.** Annual distribution of fracture types according to the AO classification. The bars show the percentage age of the patients grouped according to the type of fracture.

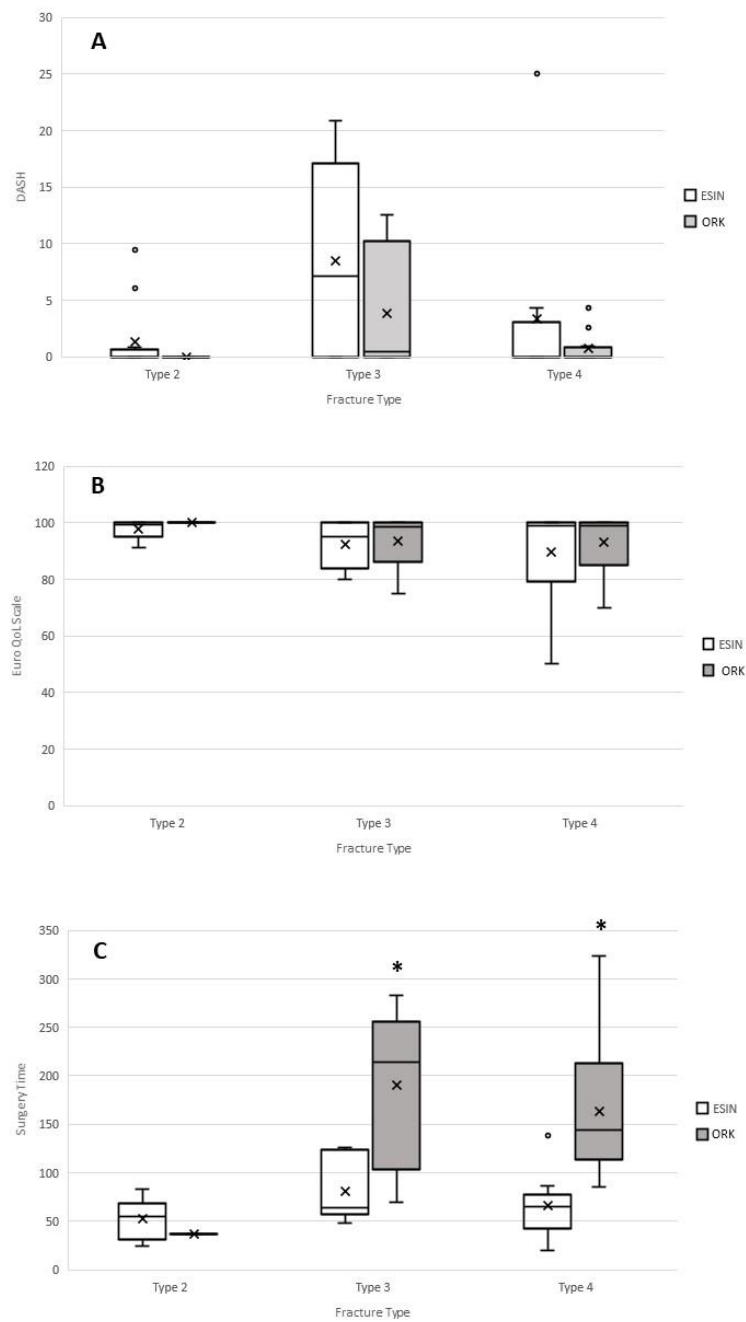

**Figure S4.** The results of the DASH, EuroQoL-5D-Y questionnaires and operative time (Surgery time) are presented and were categorized by fracture type and surgical method. As only one patient was treated using the CRK method, this case was excluded from further analysis. Results are presented by boxplots: bottom and top of box = 25th and 75th percentiles, X = mean, thin line inside box = median, I bar = maximum and minimum of data, and circle = outlier. \*  $p \leq 0.05$ ; \*\*  $p \leq 0.001$ .

| Fracture Type |              |      | N  | Mean  | Standard deviation<br>± | Standard error of the mean<br>± |
|---------------|--------------|------|----|-------|-------------------------|---------------------------------|
| Type 2        | DASH         | ESIN | 12 | 1.4   | 3.1                     | 0.9                             |
|               |              | CRK  | 1  | 0.0   |                         |                                 |
|               | EuroQoL-5D-Y | ESIN | 12 | 97.8  | 3.0                     | 0.9                             |
|               |              | CRK  | 1  | 100.0 |                         |                                 |
|               | Surgery Time | ESIN | 12 | 52.2  | 20.4                    | 5.9                             |
|               |              | CRK  | 1  | 37.0  |                         |                                 |
| Type 3        | DASH         | ESIN | 6  | 8.5   | 9.6                     | 3.9                             |
|               |              | ORK  | 6  | 3.8   | 5.7                     | 2.3                             |
|               | EuroQoL-5D-Y | ESIN | 6  | 92.5  | 8.8                     | 3.6                             |
|               |              | ORK  | 6  | 93.7  | 9.9                     | 4.1                             |
|               | Surgery Time | ESIN | 6  | 81.0  | 34.2                    | 14.0                            |
|               |              | ORK  | 6  | 190.3 | 81.5                    | 33.3                            |
| Type 4        | DASH         | ESIN | 10 | 3.4   | 7.7                     | 2.5                             |
|               |              | ORK  | 13 | 0.7   | 1.3                     | 0.4                             |
|               | EuroQoL-5D-Y | ESIN | 10 | 89.6  | 16.4                    | 5.2                             |
|               |              | ORK  | 13 | 93.0  | 10.1                    | 2.8                             |
|               | Surgery Time | ESIN | 10 | 65.7  | 33.5                    | 10.6                            |
|               |              | ORK  | 13 | 163.8 | 68.6                    | 19.0                            |

**Table S1.** The results of the DASH, EuroQoL-5D-Y questionnaires and surgery time categorized by fracture type and surgical method.

| Fracture Type |              |  | <b><u>t-Test for mean values</u></b> |            |                                            |             |
|---------------|--------------|--|--------------------------------------|------------|--------------------------------------------|-------------|
|               |              |  | Significance                         |            | 95% Confidence intervall of the difference |             |
|               |              |  | 1-tailed p                           | 2-tailed p | Lower value                                | Upper value |
| Type 2        | DASH         |  | 0.340                                | 0.679      | -5.703                                     | 8.433       |
|               | EuroQoLScale |  | 0.244                                | 0.489      | -9.166                                     | 4.666       |
|               | SurgeryTime  |  | 0.245                                | 0.489      | -31.495                                    | 61.828      |
| Type 3        | DASH         |  | 0.163                                | 0.326      | -5.412                                     | 14.782      |
|               | EuroQoLScale |  | 0.417                                | 0.834      | -13.240                                    | 10.907      |
|               | SurgeryTime  |  | 0.006*                               | 0.013*     | -189.787                                   | -28.880     |
| Type 4        | DASH         |  | 0.120                                | 0.239      | -1.888                                     | 7.153       |
|               | EuroQoLScale |  | 0.273                                | 0.546      | -14.923                                    | 8.123       |
|               | SurgeryTime  |  | <0.001**                             | <0.001**   | -147.336                                   | -48.802     |

**Table S2.** The results of statistical analysis of the DASH, EuroQoL-5D-Y questionnaires and surgery time categorized by fracture type. P-values were calculated analysing the difference between the surgical methods (ESIN vs. ORK for Type 3 and 4; ESIN vs CRK for type 2).
